# Supplementary material for: Identification of hub genes involved in the development of hepatocellular carcinoma by transcriptome sequencing
Source: PubMed Central journal article supplement (PMC5601144; doi:10.18632/oncotarget.19483), 2017-07-22
Supplement: oncotarget-08-60358-s001.pdf [file oncotarget-08-60358-s001.pdf]

# Identification of hub genes involved in the development of hepatocellular carcinoma by transcriptome sequencing

## SUPPLEMENTARY MATERIALS



**Supplementary Figure 1: Multidimensional scaling (MDS) of HCC-related genes in different samples.** MDS displays some mislabeled samples, which includes 4 samples (A5, T5, T6, and T14).



**Supplementary Figure 2: Protein-protein interaction network of significantly downregulated protein-coding genes.** The nodes represent the significantly downregulated protein-coding genes. The edges represent the interactions of significantly downregulated protein-coding genes. The green triangles represent the significantly downregulated hub genes.



Supplementary Figure 3: Dynamic expression of PRKG2, SPINK6, POU3F4 and GLI1 in HBV-related HCC (up) and HCV-related HCC (down); p < 0.01 (\*), p < 0.001 (\*\*), and p < 0.0001 (\*\*\*)



Supplementary Figure 4: Dynamic expression of CSNK2A1, HSF1, POU3F4, MYC, SCNN1A and PLCB1 in HBV-related HCC (up) and HCV-related HCC (down); p < 0.01 (\*), p < 0.001 (\*\*), and p < 0.0001 (\*\*\*)

Supplementary Table 1: Overview of the transcriptome in the liver samples

| Samples | Raw reads | Mapped (%) | Duplicates removed | Protein coding RNAs (%) | LncRNAs (%) |
|---------|-----------|------------|--------------------|-------------------------|-------------|
| A1      | 17948509  | 84.2       | 5714372            | 94.72                   | 3.65        |
| T1      | 15883949  | 82.0       | 5820812            | 95.22                   | 3.32        |
| A2      | 4840183   | 87.6       | 1839059            | 95.69                   | 3.22        |
| T2      | 5549694   | 89.7       | 2546454            | 95.80                   | 3.22        |
| A3      | 21187487  | 94.9       | 6138480            | 95.65                   | 3.21        |
| T3      | 24177621  | 93.5       | 9361910            | 96.91                   | 2.31        |
| A4      | 24882280  | 90.8       | 6572384            | 96.37                   | 2.66        |
| T4      | 25801068  | 91.6       | 8274817            | 96.56                   | 2.56        |
| A5      | 21538596  | 92.0       | 7232772            | 95.75                   | 3.13        |
| T5      | 24324041  | 93.0       | 7403792            | 96.08                   | 2.92        |
| A6      | 24521590  | 92.3       | 7216892            | 95.25                   | 3.53        |
| T6      | 24339558  | 92.9       | 7266647            | 95.65                   | 3.22        |
| A7      | 24117654  | 93.3       | 7461649            | 96.16                   | 2.81        |
| T7      | 21893007  | 94.1       | 8950417            | 95.60                   | 3.33        |
| A8      | 24845131  | 94.2       | 8451369            | 96.25                   | 2.71        |
| T8      | 24047323  | 93.5       | 9457445            | 96.72                   | 2.42        |
| A9      | 13128558  | 83.3       | 4313118            | 94.59                   | 3.78        |
| T9      | 16912464  | 84.3       | 5951490            | 95.19                   | 3.44        |
| A10     | 11862367  | 81.0       | 3609672            | 95.43                   | 3.12        |
| T10     | 24265065  | 78.2       | 5808213            | 94.56                   | 3.65        |
| A11     | 19111827  | 86.6       | 6315606            | 97.16                   | 2.04        |
| T11     | 16071621  | 86.7       | 4523902            | 93.42                   | 4.76        |
| A12     | 24775524  | 94.5       | 5451222            | 95.75                   | 3.06        |
| T12     | 24956999  | 95.0       | 4688961            | 96.01                   | 2.94        |
| A13     | 23171316  | 94.7       | 5159147            | 96.27                   | 2.68        |
| T13     | 25735081  | 94.9       | 5410995            | 96.67                   | 2.43        |
| A14     | 25073305  | 95.0       | 5152678            | 96.23                   | 2.71        |
| T14     | 25214197  | 94.8       | 4074400            | 96.19                   | 2.75        |
| A15     | 25553790  | 94.5       | 4833710            | 96.02                   | 2.88        |
| T15     | 25712581  | 94.6       | 5554565            | 96.06                   | 2.93        |

T: cancer tissue, A: adjacent non-cancerous tissue.

**Supplementary Table 2: Gene ontology functional enrichment analysis for significantly upregulated and downregulated protein-coding genes**

| Category                           | Term       | Gene function                    | Gene count | P value     |
|------------------------------------|------------|----------------------------------|------------|-------------|
| Upregulated protein-coding genes   |            |                                  |            |             |
| GOTERM_BP_FAT                      | GO:0007155 | cell adhesion                    | 29         | 2.21E-05    |
| GOTERM_BP_FAT                      | GO:0022610 | biological adhesion              | 29         | 2.27E-05    |
| GOTERM_BP_FAT                      | GO:0016337 | cell-cell adhesion               | 15         | 2.71E-04    |
| GOTERM_MF_FAT                      | GO:0005539 | glycosaminoglycan binding        | 11         | 0.000124334 |
| GOTERM_MF_FAT                      | GO:0030247 | polysaccharide binding           | 11         | 0.000271287 |
| GOTERM_MF_FAT                      | GO:0001871 | pattern binding                  | 11         | 0.000271287 |
| GOTERM_CC_FAT                      | GO:0044421 | extracellular region part        | 45         | 3.61E-09    |
| GOTERM_CC_FAT                      | GO:0005576 | extracellular region             | 67         | 1.83E-07    |
| GOTERM_CC_FAT                      | GO:0005615 | extracellular space              | 30         | 1.10E-05    |
| Downregulated protein-coding genes |            |                                  |            |             |
| GOTERM_BP_FAT                      | GO:0048562 | embryonic organ morphogenesis    | 20         | 2.44E-12    |
| GOTERM_BP_FAT                      | GO:0048568 | embryonic organ development      | 21         | 3.08E-11    |
| GOTERM_BP_FAT                      | GO:0048598 | embryonic morphogenesis          | 24         | 6.77E-09    |
| GOTERM_MF_FAT                      | GO:0043565 | sequence-specific DNA binding    | 31         | 1.44E-06    |
| GOTERM_MF_FAT                      | GO:0030528 | transcription regulator activity | 54         | 5.78E-06    |
| GOTERM_MF_FAT                      | GO:0003700 | transcription factor activity    | 40         | 6.52E-06    |
| GOTERM_CC_FAT                      | GO:0005911 | cell-cell junction               | 9          | 0.011585712 |
| GOTERM_CC_FAT                      | GO:0043296 | apical junction complex          | 5          | 0.074824629 |
| GOTERM_CC_FAT                      | GO:0016327 | apicolateral plasma membrane     | 5          | 0.081483335 |

**Supplementary Table 3: Pathway functional enrichment analysis for significantly upregulated and downregulated protein-coding genes**

See Supplementary File 1
